# Supplementary material
Source: PubMed Central journal article supplement (PMC5391704)

## **Web Material**

Web Table 1. Distribution of colorectal cancer risk factors in the Nurses' Health Study, 1980, 1986, 1990, 1998, 2006.

|                                                      | 1980 (n=88 583) |      |    | 1986 (N= 87 469) |      |    | 1990 (N=86 163) |      |    | 1998 (N=81 946) |      |    | 2006 (N=74 121) |      |     |
|------------------------------------------------------|-----------------|------|----|------------------|------|----|-----------------|------|----|-----------------|------|----|-----------------|------|-----|
|                                                      | Mean            | SD   | %  | Mean             | SD   | %  | Mean            | SD   | %  | Mean            | SD   | %  | Mean            | SD   | %   |
| Age (Years)                                          | 46.2            | 7.2  |    | 52.2             | 7.1  |    | 56.2            | 7.1  |    | 63.9            | 7.1  |    | 71.5            | 7.0  |     |
| Red Meat Intake <sup>b</sup><br>(Servings/Day)       | 0.78            | 0.48 |    | 0.53             | 0.34 |    | 0.49            | 0.32 |    | 0.42            | 0.29 |    | 0.40            | 0.28 |     |
| Processed Meat Intake <sup>c</sup><br>(Servings/Day) | 0.37            | 0.38 |    | 0.26             | 0.27 |    | 0.21            | 0.23 |    | 0.22            | 0.24 |    | 0.22            | 0.24 |     |
| Folate (mcg/day)                                     | 364             | 262  |    | 400              | 211  |    | 423             | 210  |    | 597             | 268  |    | 728             | 334  |     |
| Calcium (mg/day)                                     | 732             | 311  |    | 1025             | 480  |    | 966             | 470  |    | 1207            | 582  |    | 1405            | 631  |     |
| Physical Activity (MET-hrs/wk)                       | <sup>c</sup>    |      |    | 12.9             | 14.5 |    | 14.2            | 16.0 |    | 16.0            | 18.0 |    | 18.3            | 20.0 |     |
| BMI (kg/m <sup>2</sup> )                             | 24.4            | 4.5  |    | 25.3             | 4.8  |    | 25.8            | 4.9  |    | 26.7            | 5.4  |    | 26.6            | 5.4  |     |
| Alcohol (All; g/day)                                 | 6               | 16   |    | 6                | 10   |    | 5               | 9    |    | 4               | 9    |    | 5               | 10   |     |
| Alcohol (Alcohol Drinkers;<br>g/day)                 | 9               | 12   |    | 9                | 11   |    | 8               | 10   |    | 7               | 9    |    | 7               | 9    |     |
| Smoking (All; Pack-Years)                            | 11              | 16   |    | 13               | 18   |    | 13              | 19   |    | 14              | 20   |    | 13              | 20   |     |
| Smoking (Smokers; Pack-<br>years)                    | 21              | 17   |    | 23               | 19   |    | 20              | 16   |    | 25              | 22   |    | 24              | 22   |     |
| Aspirin Use (All;<br>Tablets/Week)                   | 2.7             | 4.9  |    | 2.7              | 4.1  |    | 2.6             | 3.5  |    | 2.5             | 3.0  |    | 2.3             | 2.7  |     |
| Aspirin Use (Among Users;<br>Tablets/Week)           | 6.8             | 5.7  |    | 4.1              | 4.4  |    | 3.5             | 3.6  |    | 3.2             | 3.0  |    | 2.9             | 2.8  |     |
| PMH Use (Among Post-<br>Menopausal Women)            |                 |      |    |                  |      |    |                 |      |    |                 |      |    |                 |      |     |
| Never                                                |                 |      | 57 |                  |      | 52 |                 |      | 41 |                 |      | 26 |                 |      | 22  |
| Current                                              |                 |      | 19 |                  |      | 26 |                 |      | 37 |                 |      | 50 |                 |      | 14  |
| Past                                                 |                 |      | 25 |                  |      | 22 |                 |      | 22 |                 |      | 24 |                 |      | 64  |
| Post-menopausal (%)                                  |                 |      | 44 |                  |      | 66 |                 |      | 78 |                 |      | 96 |                 |      | 100 |
| Family History (%)                                   |                 |      | 8  |                  |      | 8  |                 |      | 11 |                 |      | 17 |                 |      | 19  |
| Report of Sigmoidoscopy or<br>Colonoscopy (%)        |                 |      | 10 |                  |      | 19 |                 |      | 26 |                 |      | 32 |                 |      | 53  |

Abbreviations: MET= Metabolic Equivalents; BMI = Body Mass Index; PMH = Post-menopausal Hormones.

<sup>a</sup> Red meat includes the following specific food items: hamburger, beef/pork/lamb as a mixed dish, and beef/pork/lamb as a main dish.

<sup>b</sup> Processed meat variable includes the following specific food items: hot dog, processed meat, processed meat sandwich, and bacon.

<sup>c</sup> Physical activity information in MET hrs/week calculated starting in 1986.

Web Figure 1. Cumulative Incidence of Colorectal Cancer per 100,000 for: A) a Woman Who Was a Never Smoker Versus a Current Smoker who Accrued 15 Pack-Years by Age 30, Then Smoked 1 Pack per Day from Age 50-70; B) a Woman with a BMI (Body Mass Index) of 20 kg/m<sup>2</sup> Versus a BMI of 30 kg/m<sup>2</sup>; C) a Woman Who Completed 2 MET (metabolic equivalent)-hours/week of Physical Activity Versus 21 MET-hrs/week ; From a Model Based on Nurses' Health Study Data, 1980-2010. Unless Otherwise Specified, All Women are Assumed at Baseline to: be Age 50, Have No Family History, Consume 1 Serving per Day of Red Meat, Consume No Processed Meat, Consume 400 mcg/day of Folate, Have a BMI of 26kg/m\*m, Perform 15 MET-hours per week of Physical Activity, Have a Height of 64.5 Inches, Consume No Alcohol, Not Use Aspirin, Be Never screened, Never Use PMH, and Consume 1000 mg/day of Calcium. Nurses' Health Study 1980-2010. MET-hrs/week = Metabolic equivalent-hours per week; kg = kilograms, m=meters.

Web Figure 1.

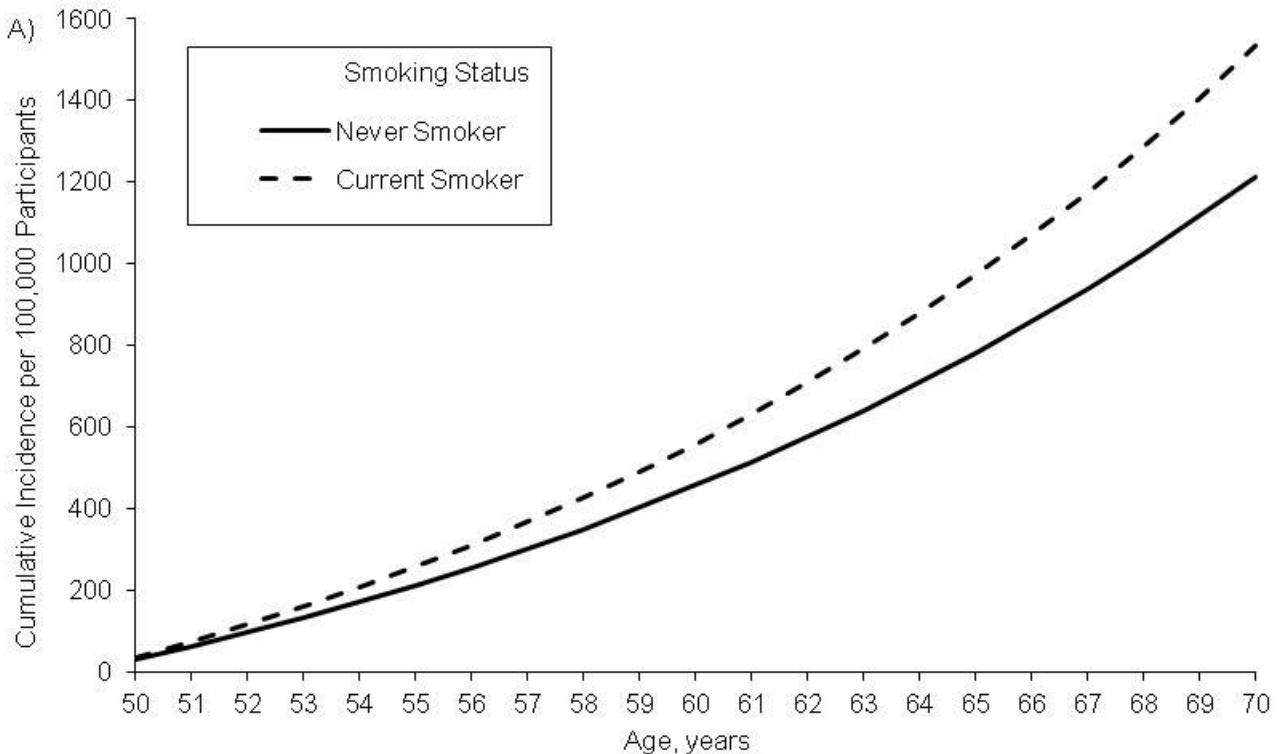

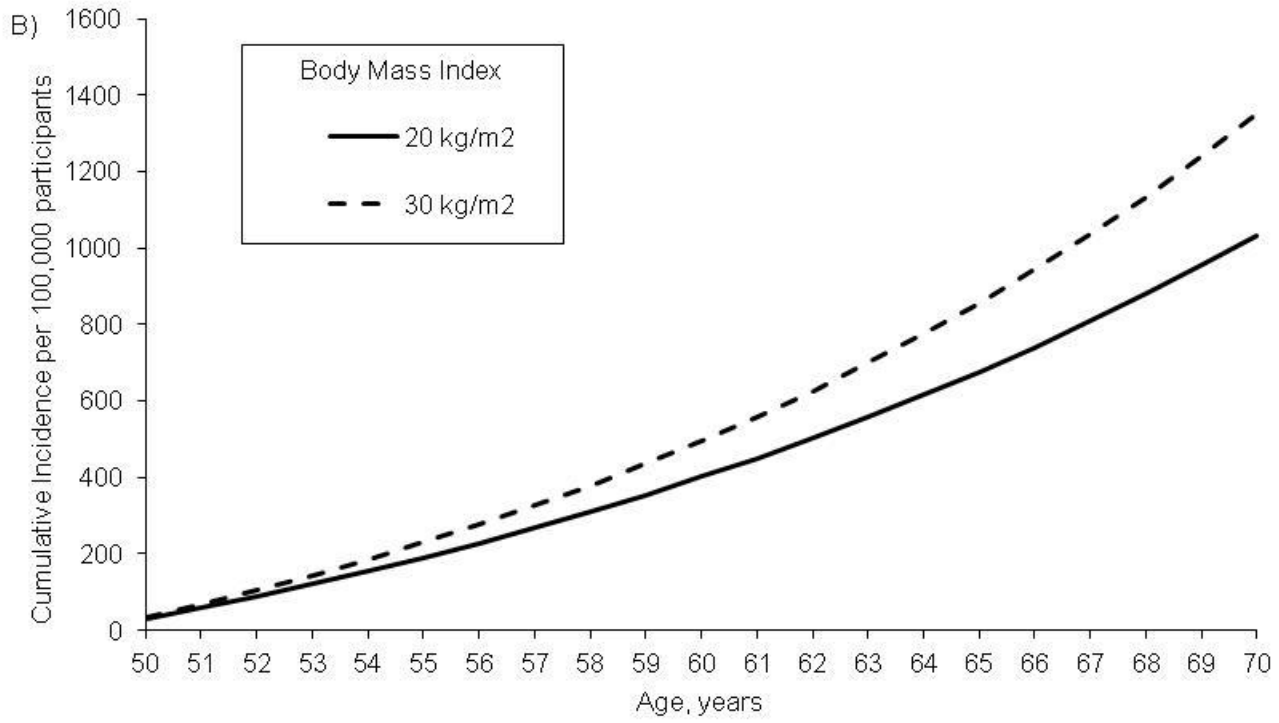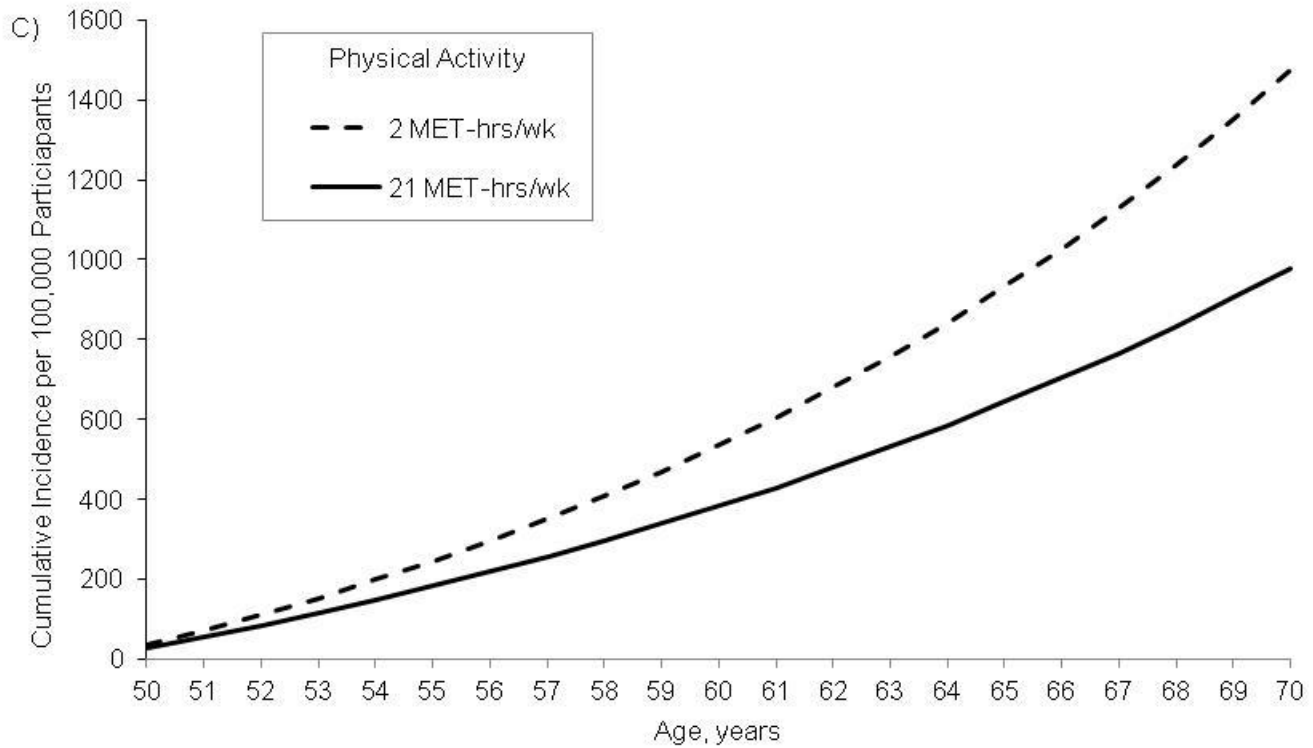

Web Figure 2. Cumulative Incidence per 100,000 of Colorectal Cancer for the Dietary Variables Folate and Calcium for: A) a Woman who Consumed 600 mcg/day of Folate Versus 200 mcg/day; and B) a Woman who Consumed 1000 mg/day of Calcium Versus 500 mg/day, From a Model Based on Nurses' Health Study Data, 1980-2010. Unless Otherwise Specified, All Women are Assumed at Baseline to: be Age 50, Have No Family History, Consume 1 Serving per Day of Red Meat, Consume No Processed Meat, Consume 400 mcg/day of Folate, Have a BMI of 26kg/m<sup>2</sup>, Perform 15 MET-hours per week of Physical Activity, Have a Height of 64.5 Inches, Consume No Alcohol, Not Use Aspirin, Be Never screened, Never Use PMH, and Consume 1000 mg/day of Calcium. Nurses' Health Study 1980-2010. mcg=micrograms; mg=milligrams.

Web Figure 2.

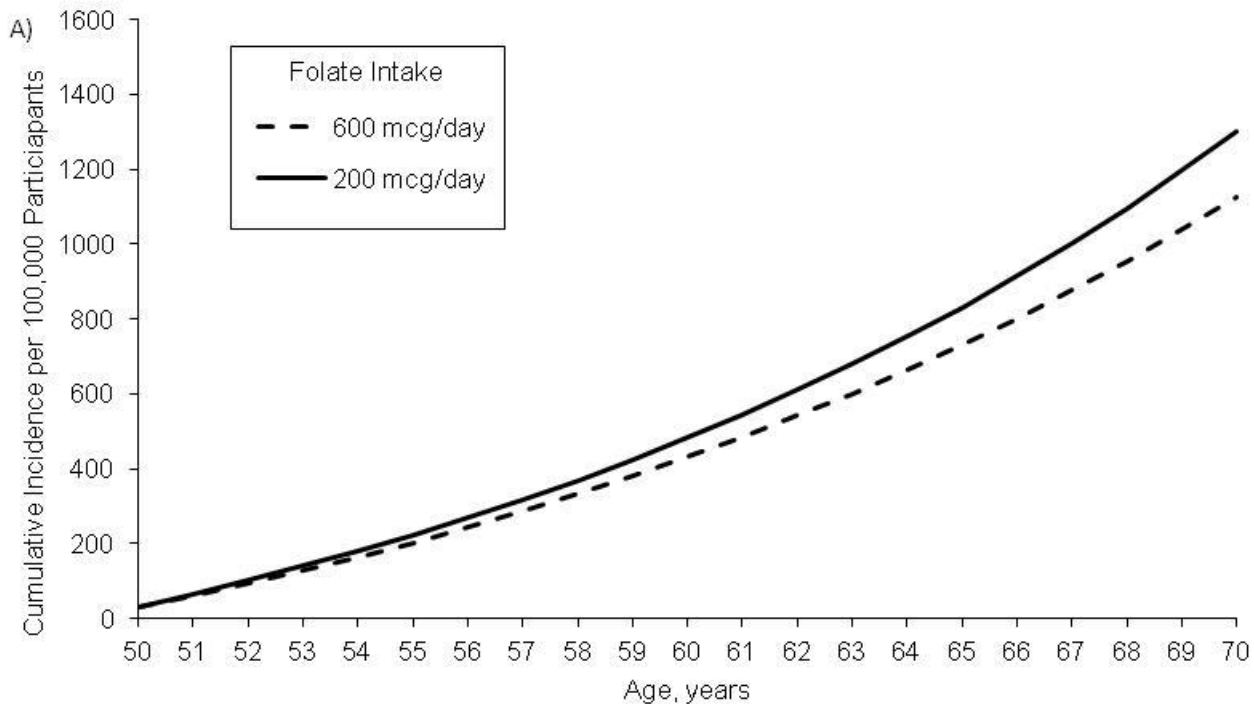

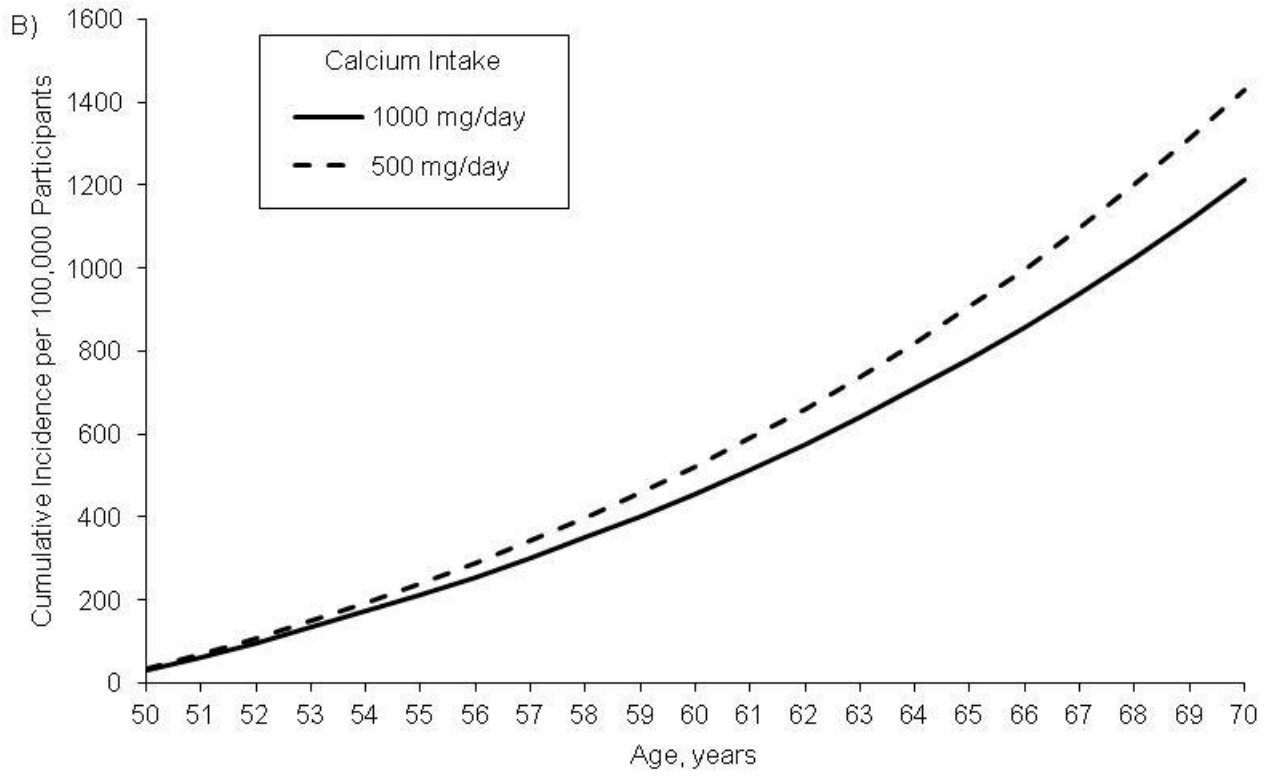

Supplement: kww183weiwebmaterialfinal.pdf [file kww183weiwebmaterialfinal.pdf]
